# Supplementary material for: Nanocomposite of MgFe2O4 and Mn3O4 as Polyphenol Oxidase Mimic for Sensing of Polyphenols
Source: MDPI journal article supplement (doi:10.3390/bios12060428), 2022-06-17
Supplement: s1 [file s1]

Supplementary Data

# Nanocomposite of $\text{MgFe}_2\text{O}_4$ and $\text{Mn}_3\text{O}_4$ as Polyphenol Oxidase Mimic for Sensing of Polyphenols

Harmilan Kaur <sup>1</sup>, Manpreet Kaur <sup>1,\*</sup>, Renuka Aggarwal <sup>2</sup>, Sucheta Sharma <sup>3</sup> and Davinder Singh <sup>4</sup>

<sup>1</sup> Department of Chemistry, Punjab Agricultural University, Ludhiana 141004, India; harmilan2020-cm@pau.edu

<sup>2</sup> Department of Food and Nutrition, Punjab Agricultural University, Ludhiana 141004, India; renukaaggarwal@pau.edu

<sup>3</sup> Department of Biochemistry, Punjab Agricultural University, Ludhiana 141004, India; suchetasharma\_pau@pau.edu

<sup>4</sup> Department of Extension Education, Punjab Agricultural University, Ludhiana 141004, India; davinder-ee@pau.edu

\* Correspondence: manpreetchem@pau.edu

**Table S1.** Details of characterization techniques.

| S.No. | Instruments                                                                | Model                                                                                          |
|-------|----------------------------------------------------------------------------|------------------------------------------------------------------------------------------------|
| 1.    | Fourier Transformed Infrared spectroscopy (FT-IR)                          | Thermo Nicolet 6700 Fourier Transform Infrared Spectrometer                                    |
| 2.    | Scanning electron microscopy with Energy dispersive spectroscopy (SEM-EDS) | Hitachi S-3400 and EDS on Thermo Noran System                                                  |
| 3.    | Transmission electron microscopy (TEM)                                     | Hitachi Hi-7650 at 100 kV accelerate voltages in HC mode                                       |
| 4.    | UV–Visible spectrophotometer                                               | Shimadzu (UV-1800) UV spectrophotometer                                                        |
| 5.    | Vibrating sample magnetometer (VSM)                                        | Model PAR-155                                                                                  |
| 6.    | X-ray Diffraction (XRD)                                                    | $\text{CuK}\alpha$ radiations ( $\lambda = 1.5404 \text{ \AA}$ ) with a Panalytical X pert Pro |

**Table S2.** Variables, level of design experiments, and Box-Behnken Design (for catechol and resorcinol).

| Factor              | Value | Low | High |
|---------------------|-------|-----|------|
| pH                  | A     | 1   | 9    |
| Temp (°C)           | B     | 10  | 60   |
| Catalytic Dose (mg) | C     | 1   | 6    |
| Contact Time (min)  | D     | 2   | 20   |

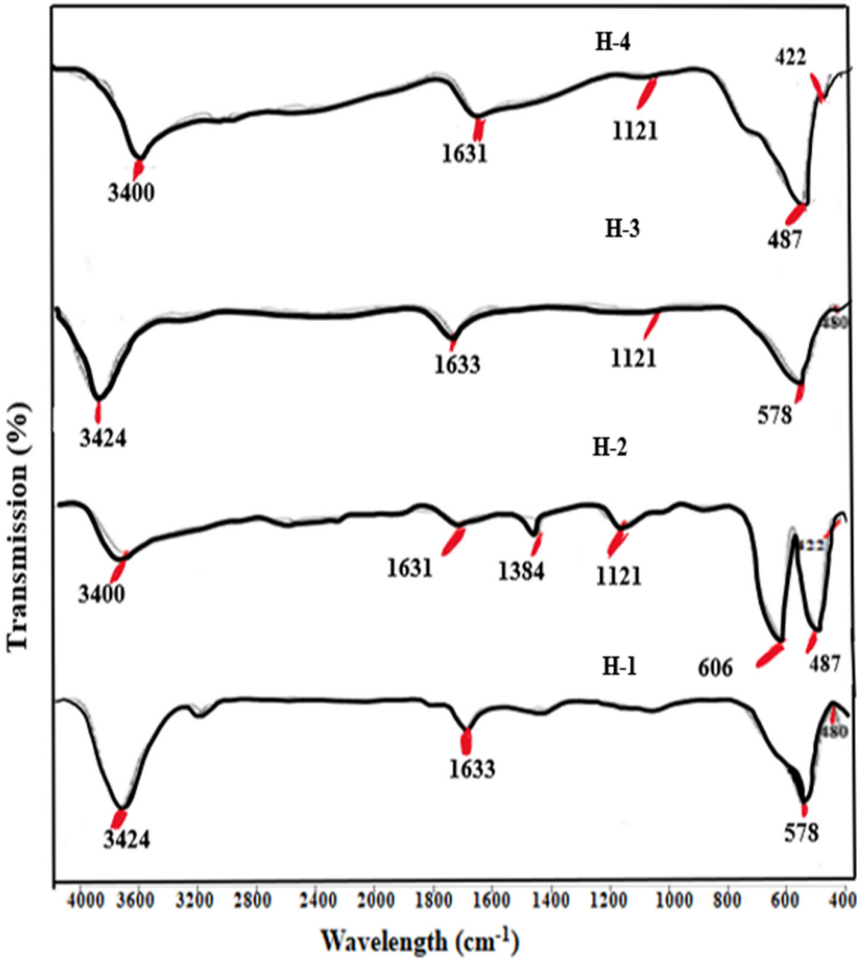

Figure S1. FT-IR spectra of H -1, H -2, H -3 and H -4 NPs.

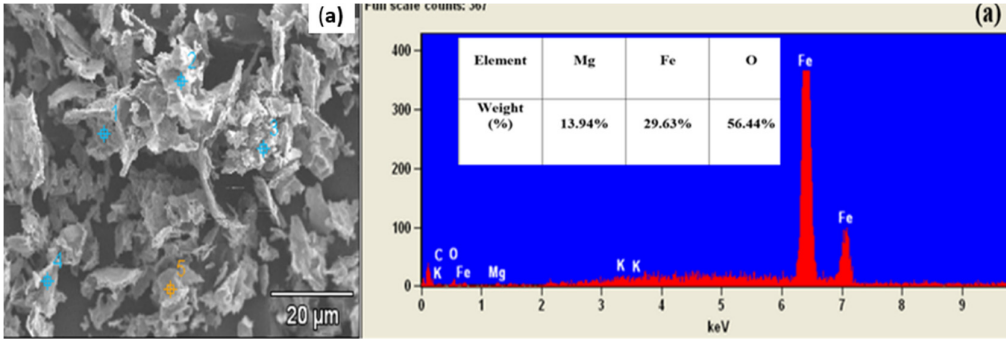

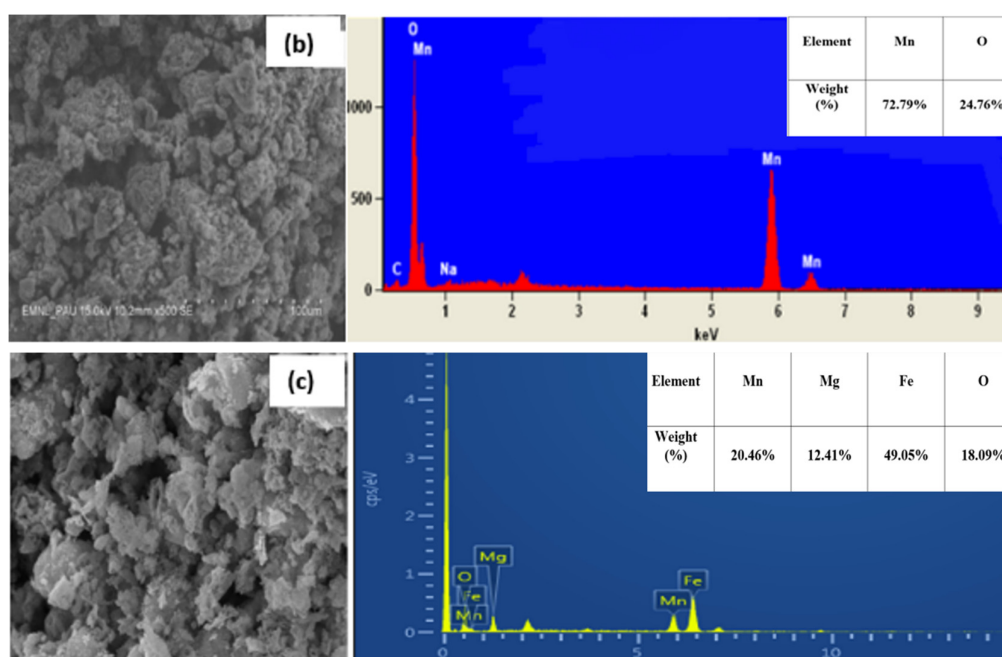

Figure S2. SEM EDS of (a) H-1 NPs (b) H-2 NPs (c) H-3 NC.

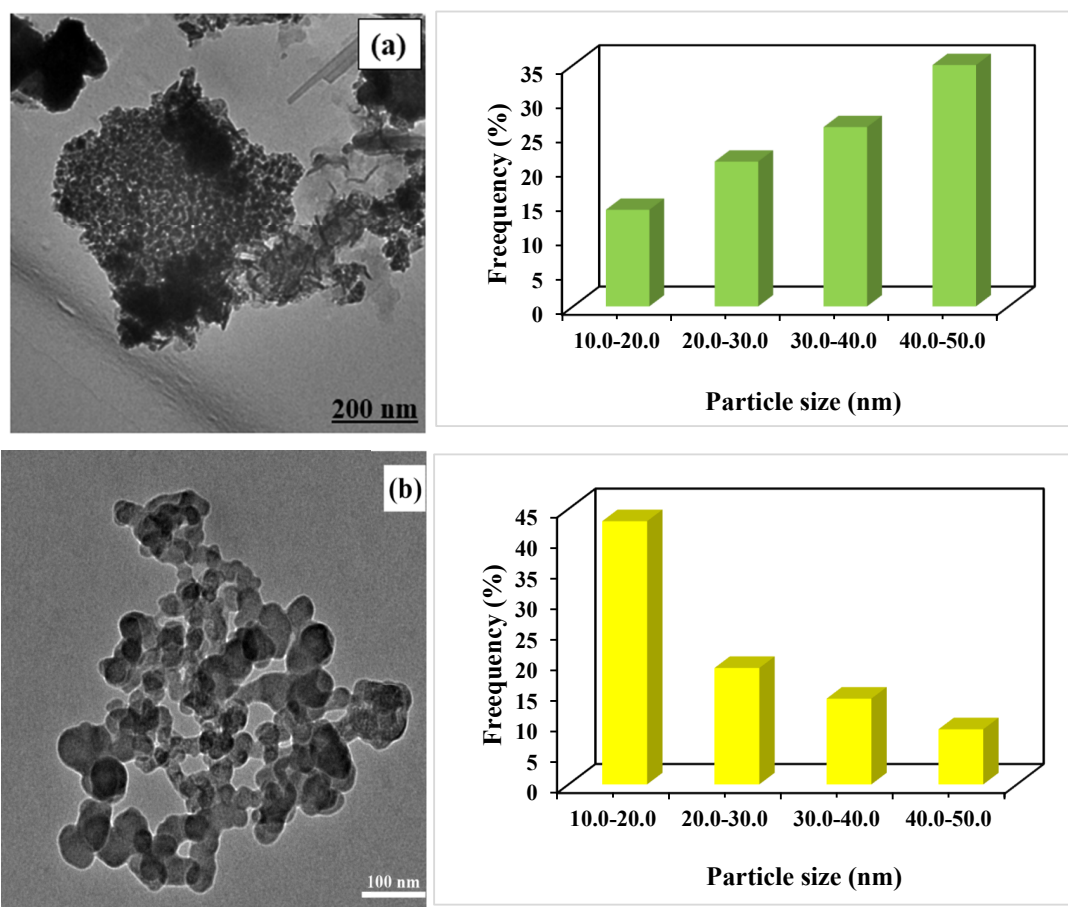

Figure S3. TEM of (a) H-1 NPs (b) H-2 NPs.

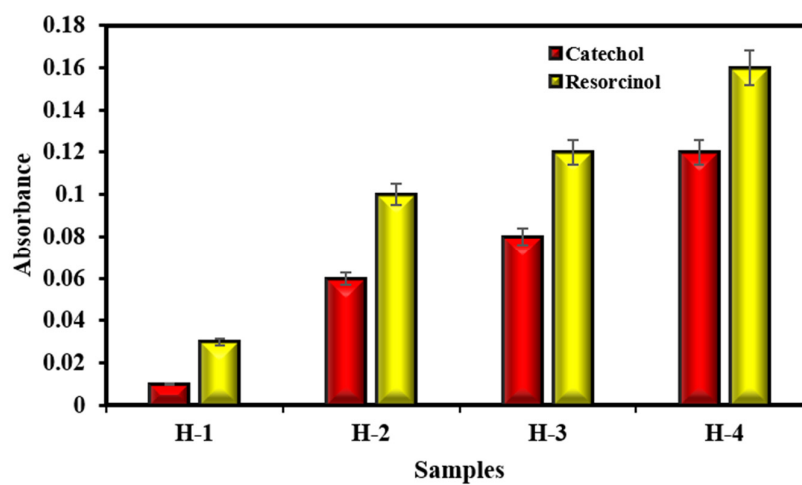

Figure S4. Comparison of activity of different samples.

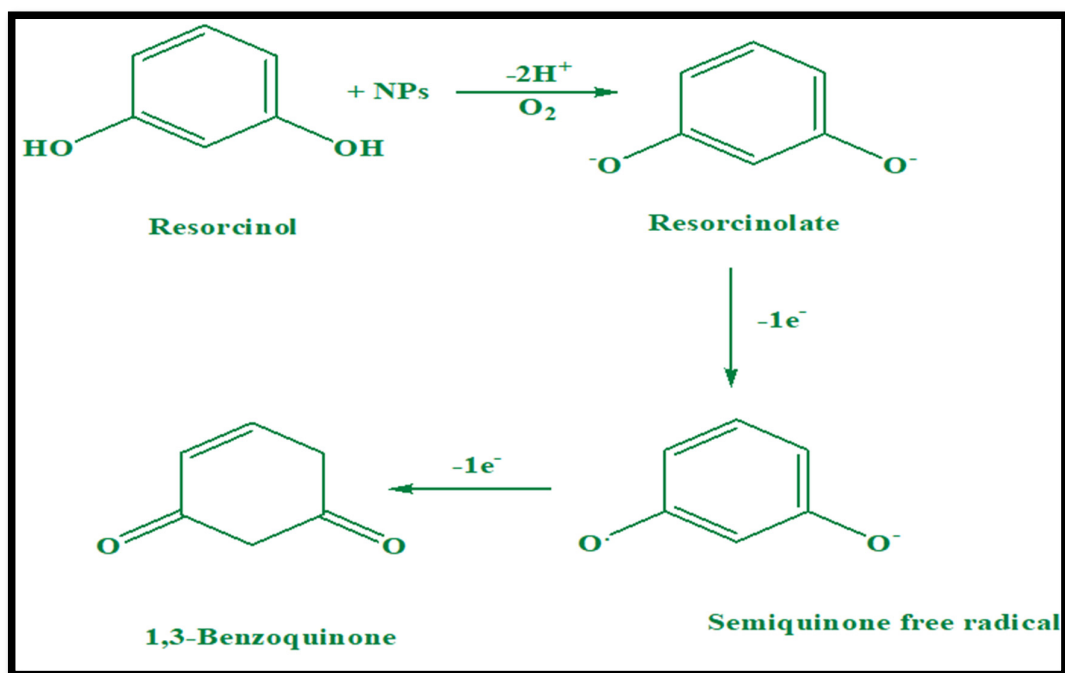

Scheme S1. Mechanism of PPO activity using resorcinol.

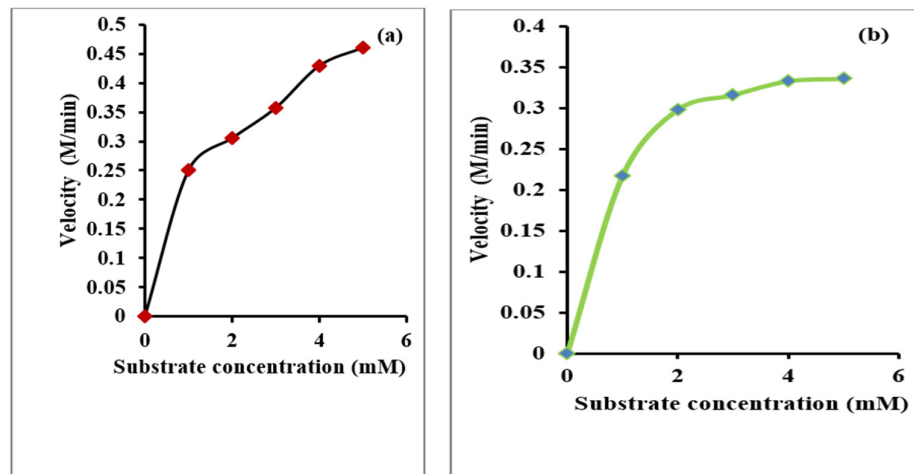

**Figure S5.** Plot of initial rates versus substrate concentration of oxidation catalysed by H-4 nano-composite (a) Catechol (b) Resorcinol.

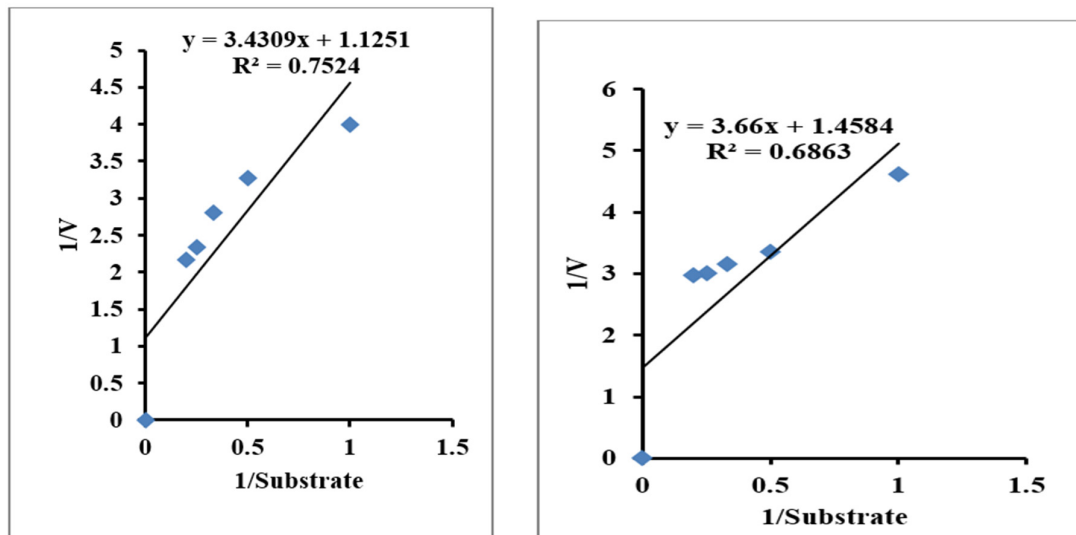

**Figure S6.** The lineweaver burk plot for H-4 NC (a) Catechol (b) Resorcinol.

**Table S3.** Kinetic parameters for PPO-like activity mention in text discuss.

| Enzyme mimic                   | $K_m$ (mM)         | $V_{max}$ (mol L <sup>-1</sup> min <sup>-1</sup> ) | Reference    |
|--------------------------------|--------------------|----------------------------------------------------|--------------|
| Mn <sub>3</sub> O <sub>4</sub> | 1.14               | 0.52                                               | Present work |
| H-4 NPs                        | 0.71               | 0.336                                              | Present work |
| Au@Pt NPs                      | $1.29 \times 10^2$ | 13.97                                              | [55]         |
| Fe(L) <sup>2</sup> ]SCN        | 1.3                | $9.1 \times 10^{-6}$                               | [56]         |

**Table S4.** Analyses of variance for quadratic model of catechol.

| Source           | Sum of Squares | df | Mean Square | F-value | p-value |             |
|------------------|----------------|----|-------------|---------|---------|-------------|
| Model            | 2.77           | 11 | 0.2518      | 4.04    | 0.0044  | Significant |
| A-pH             | 0.1633         | 1  | 0.1633      | 2.62    | 0.1230  |             |
| B-Temp           | 0.0033         | 1  | 0.0033      | 0.0535  | 0.8198  |             |
| C-Catalytic Dose | 0.0556         | 1  | 0.0556      | 0.5503  | 0.4686  |             |
| D-Contact Time   | 0.1633         | 1  | 0.1633      | 2.62    | 0.1230  |             |

|                  |             |           |        |        |        |                 |
|------------------|-------------|-----------|--------|--------|--------|-----------------|
| AB               | 0.0100      | 1         | 0.0100 | 0.1604 | 0.6935 |                 |
| AD               | 1.0000      | 1         | 1.0000 | 16.04  | 0.0008 |                 |
| BC               | 0.1225      | 1         | 0.1225 | 1.96   | 0.1781 |                 |
| BD               | 0.3025      | 1         | 0.3025 | 4.85   | 0.0409 |                 |
| CD               | 0.0025      | 1         | 0.0025 | 0.0401 | 0.8436 |                 |
| C <sup>2</sup>   | 0.4011      | 1         | 0.4011 | 6.43   | 0.0207 |                 |
| D <sup>2</sup>   | 0.4900      | 1         | 0.4900 | 7.86   | 0.0118 |                 |
| Residual         | 1.12        | 18        | 0.0624 |        |        |                 |
| Lack of Fit      | 0.8675      | 13        | 0.0667 | 1.31   | 0.4085 | not significant |
| Pure Error       | 0.2550      | 5         | 0.0510 |        |        |                 |
| <b>Cor Total</b> | <b>3.89</b> | <b>29</b> |        |        |        |                 |

 $R^2 = 0.7116$ 

**Table S5.** Analysis of variance for quadratic model of resorcinol.

| Source           | Sum of Squares | df        | Mean Square | F-value | p-value |             |
|------------------|----------------|-----------|-------------|---------|---------|-------------|
| <b>Model</b>     | 2.85           | 12        | 0.2375      | 2.45    | 0.0448  | Significant |
| A-pH             | 0.1875         | 1         | 0.1875      | 1.93    | 0.1823  |             |
| B-Temp           | 0.0408         | 1         | 0.0408      | 0.4211  | 0.5250  |             |
| C-Catalytic Dose | 0.0533         | 1         | 0.0533      | 0.5501  | 0.4684  |             |
| D-Contact Time   | 0.0133         | 1         | 0.0133      | 0.1375  | 0.7153  |             |
| AB               | 0.7225         | 1         | 0.7225      | 7.45    | 0.0143  |             |
| AC               | 0.2500         | 1         | 0.2500      | 2.58    | 0.1267  |             |
| BD               | 0.0225         | 1         | 0.0225      | 0.2321  | 0.6361  |             |
| CD               | 0.7225         | 1         | 0.7225      | 7.45    | 0.0143  |             |
| A <sup>2</sup>   | 0.3344         | 1         | 0.3344      | 3.45    | 0.0807  |             |
| B <sup>2</sup>   | 0.0744         | 1         | 0.0744      | 0.7674  | 0.3932  |             |
| C <sup>2</sup>   | 0.2976         | 1         | 0.2976      | 3.07    | 0.0978  |             |
| D <sup>2</sup>   | 0.1719         | 1         | 0.1719      | 1.77    | 0.2006  |             |
| <b>Residual</b>  | 1.65           | 17        | 0.0970      |         |         |             |
| Lack of Fit      | 1.56           | 12        | 0.1296      | 6.94    | 0.0219  | Significant |
| Pure Error       | 0.0933         | 5         | 0.0187      |         |         |             |
| <b>Cor Total</b> | <b>4.50</b>    | <b>29</b> |             |         |         |             |

 $R^2 = 0.6336$

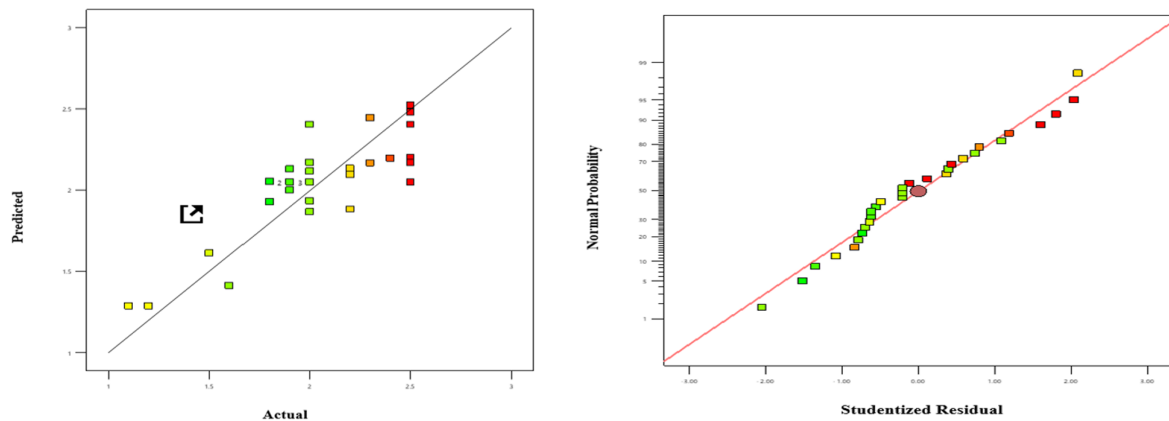

**Figure S7.** (a) Correlation between the experiments with predicted values of enzyme activity (using catechol), (b) Normal probability plot of residuals obtained by ANOVA for the enzyme activity of H-4 nanocomposite (using catechol).

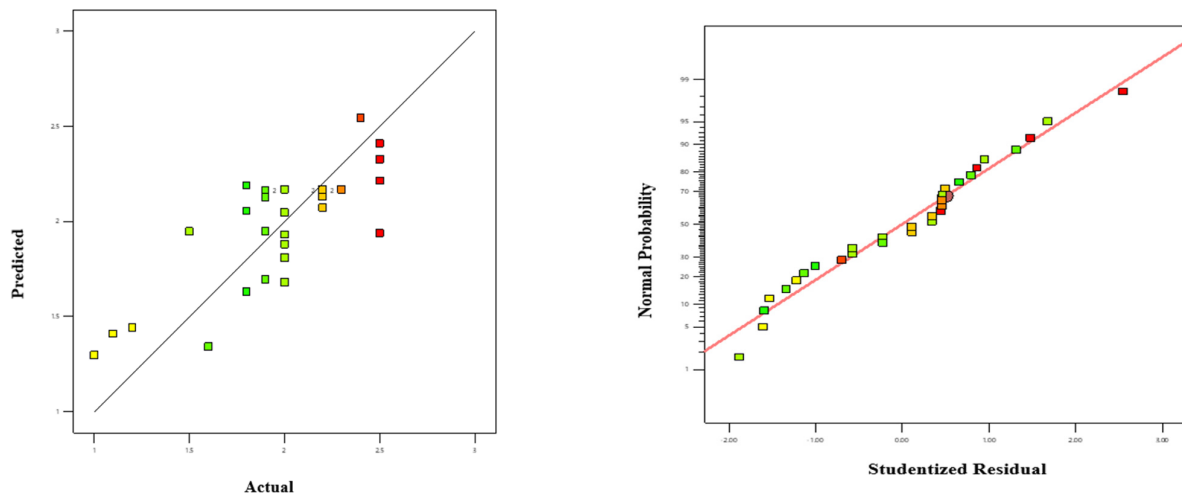

**Figure S8.** Correlation between the experiments with predicted values of enzyme activity (using resorcinol), (b) Normal probability plot of residuals obtained by ANOVA for the enzyme activity of H-4 nanocomposite (using resorcinol).

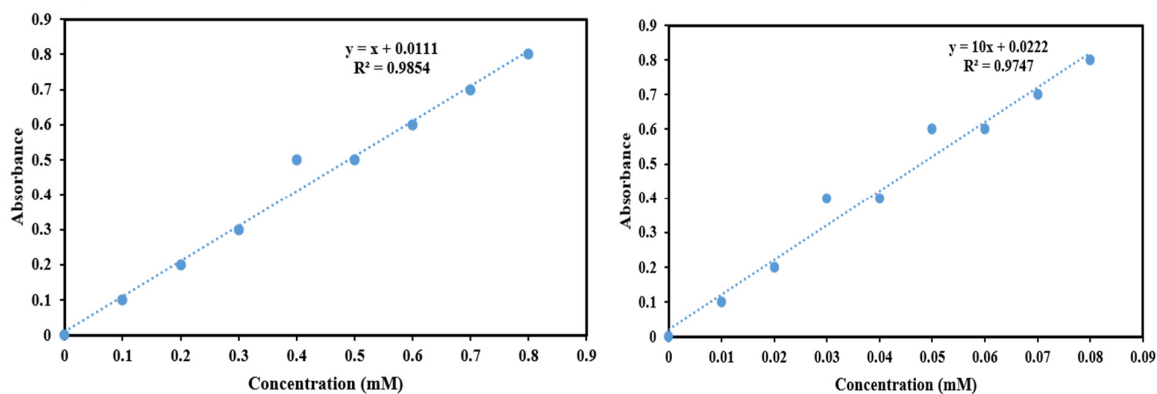

**Figure S9.** The linear calibration plots for (a) catechol detection b) resorcinol detection.

(pH =3.0; Temp=25 °C and 0.5 ml H<sub>2</sub>O<sub>2</sub>).

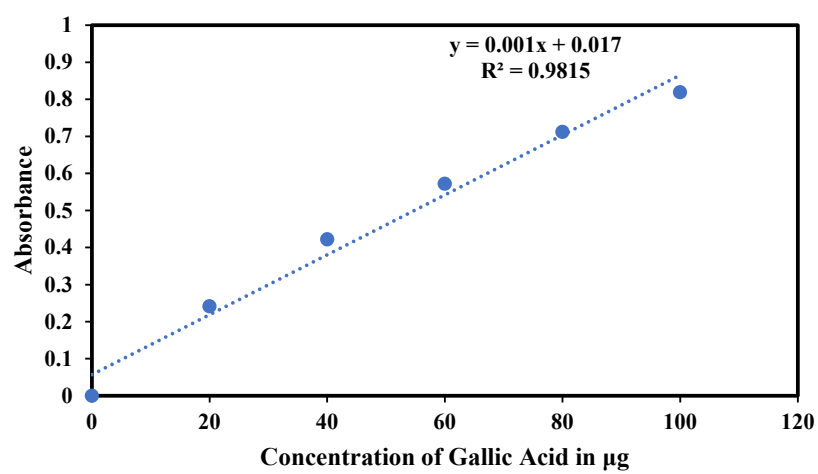

**Figure S10.** Calibration plot of total phenolic content determined by the  $\text{MgFe}_2\text{O}_4@\text{Mn}_3\text{O}_4$  nano-composite based assay.
